# Supplementary material for: Characterizing Longitudinal Antibody Responses in Recovered Individuals Following COVID-19 Infection and Single-Dose Vaccination: A Prospective Cohort Study
Source: MDPI journal article supplement (doi:10.3390/v14112416), 2022-10-31
Supplement: s1 [file s1]

**Supplemental Materials:**

**Table S1.** Summary of serological test results.

| Test                                  | No. samples tested | No. samples positive (%) | No. (%) positive<br><6 months | No.% positive<br>>6 months | *P-Value |
|---------------------------------------|--------------------|--------------------------|-------------------------------|----------------------------|----------|
| Total anti-RBD <sup>§</sup> (Siemens) | 340                | 324 (95%)                | (191/196)<br>97%              | (133/144)<br>92%           | 0.05     |
| Anti-N IgG (Abbott)                   | 335                | 158 (47%)                | (140/194)<br>72%              | (18/141)<br>13%            | <0.001   |
| Total anti-S (Ortho)                  | 181                | 181 (100%)               | (56/56)<br>100%               | (125/125)<br>100%          | --       |
| Anti-RBD <sup>§</sup> IgG (MSD)       | 339                | 324 (96%)                | (189/196)<br>96%              | (135/143)<br>94%           | 0.53     |
| Anti-N IgG (MSD)                      | 339                | 196 (58%)                | (149/196)<br>76%              | (47/143)<br>33%            | <0.001   |
| Anti-S IgG (MSD)                      | 339                | 303 (89%)                | (181/196)<br>92%              | (122/143)<br>85%           | 0.06     |

<sup>§</sup> 2 samples negative by anti-RBD (Siemens) were not available for Abbott or Ortho testing

\* P-Values are reported for a Chi-square test ( $\chi^2$ test) for two independent proportions.

**Table S2.** Descriptive summary of variables not included in the analysis for n= 21 vaccinated participants.

| Count | Participant ID | Date of PCR Diagnosis | Viral Variant (Pangolin Lineage) | Vaccination Date | Diagnosis to Vaccination Time (Days) | Asymptomatic Infection | Febrile | Hospitalized |
|-------|----------------|-----------------------|----------------------------------|------------------|--------------------------------------|------------------------|---------|--------------|
| 1     | 113            | 2021-01-11            | B.1.2                            | 2021-01-31       | 20                                   | Yes                    | No      | No           |
| 2     | 115            | 2020-12-09            | B.1.36                           | 2021-03-14       | 95                                   | No                     | No      | No           |
| 3     | 120            | 2020-12-10            | B.1.2                            | 2021-03-31       | 111                                  | No                     | No      | No           |
| 4     | 121            | 2020-12-14            | P.2                              | 2021-04-13       | 120                                  | No                     | Yes     | No           |
| 5     | 122            | 2020-12-02            | B.1.36                           | 2021-05-06       | 155                                  | No                     | No      | No           |
| 6     | 123            | 2020-12-14            | B.1.1.231                        | 2021-05-13       | 150                                  | No                     | No      | No           |
| 7     | 125            | 2021-02-03            | --                               | 2021-04-27       | 83                                   | No                     | No      | Yes          |
| 8     | 29             | 2020-10-25            | --                               | 2021-01-31       | 98                                   | --                     | Yes     | No           |
| 9     | 55             | 2020-03-22            | A.1                              | 2021-03-04       | 347                                  | --                     | Yes     | No           |
| 10    | 6              | 2020-10-02            | B.1.128                          | 2021-01-20       | 110                                  | No                     | No      | No           |
| 11    | 62             | 2020-03-09            | --                               | 2021-03-18       | 374                                  | No                     | No      | No           |
| 12    | 75             | 2020-03-23            | A.1                              | 2021-03-04       | 346                                  | No                     | No      | No           |
| 13    | 76             | 2020-05-01            | B.1                              | 2021-03-05       | 308                                  | No                     | No      | No           |
| 14    | 77             | 2020-04-01            | B.1                              | 2021-03-02       | 335                                  | No                     | No      | No           |
| 15    | 78             | 2020-03-20            | B.1                              | 2021-03-09       | 354                                  | --                     | Yes     | No           |
| 16    | 83             | 2020-03-20            | A.1                              | 2021-02-25       | 342                                  | No                     | No      | No           |
| 17    | 85             | 2020-03-30            | B.1                              | 2021-03-05       | 340                                  | No                     | No      | No           |
| 18    | 89             | 2020-03-23            | A.1                              | 2021-02-25       | 339                                  | No                     | No      | No           |
| 19    | 9              | 2020-05-06            | --                               | 2021-01-22       | 261                                  | No                     | No      | No           |
| 20    | 94             | 2020-08-24            | B.1.128                          | 2021-02-23       | 183                                  | No                     | No      | No           |
| 21    | 98             | 2021-01-01            | B.1.36                           | 2021-03-10       | 68                                   | No                     | No      | No           |

-- Indicates missing data, variables with missing data were not included in the statistical analysis and are presented for description and context.

**Table S3.** Descriptive summary of variables not included in the analysis for n= 21 unvaccinated participants.

| Count | Participant ID | Date of PCR Diagnosis | Viral Variant (Pangolin Lineage) | Vaccination Date | Diagnosis to Vaccination Time (Days) | Asymptomatic Infection | Febrile | Hospitalized |
|-------|----------------|-----------------------|----------------------------------|------------------|--------------------------------------|------------------------|---------|--------------|
| 1     | 124            | 2020-09-13            | AE.8                             | -                | -                                    | No                     | No      | No           |
| 2     | 131            | 2020-09-17            | --                               | -                | -                                    | No                     | No      | No           |
| 3     | 132            | 2020-07-11            | --                               | -                | -                                    | No                     | No      | No           |
| 4     | 136            | 2020-05-05            | --                               | -                | -                                    | Yes                    | No      | No           |
| 5     | 138            | 2020-12-26            | --                               | -                | -                                    | Yes                    | No      | No           |
| 6     | 18             | 2020-11-02            | B.1.1.464                        | -                | -                                    | --                     | Yes     | No           |
| 7     | 22             | 2020-08-08            | B.1.422                          | -                | -                                    | Yes                    | No      | No           |
| 8     | 34             | 2020-11-15            | B.1.1.231                        | -                | -                                    | No                     | No      | No           |
| 9     | 36             | 2020-08-09            | --                               | -                | -                                    | No                     | No      | No           |
| 10    | 37             | 2020-08-13            | B.1.422                          | -                | -                                    | No                     | No      | No           |
| 11    | 39             | 2020-10-30            | --                               | -                | -                                    | No                     | No      | No           |
| 12    | 42             | 2020-08-14            | B.1.422                          | -                | -                                    | No                     | No      | No           |
| 13    | 47             | 2020-08-03            | --                               | -                | -                                    | --                     | Yes     | No           |
| 14    | 5              | 2020-09-19            | --                               | -                | -                                    | No                     | No      | Yes          |
| 15    | 51             | 2020-11-08            | B.1.36                           | -                | -                                    | No                     | No      | Yes          |
| 16    | 52             | 2020-10-22            | B.1.36                           | -                | -                                    | --                     | No      | No           |
| 17    | 54             | 2020-11-19            | B.1.36                           | -                | -                                    | No                     | Yes     | Yes          |
| 18    | 61             | 2020-03-18            | --                               | -                | -                                    | No                     | No      | No           |
| 19    | 67             | 2020-05-01            | --                               | -                | -                                    | No                     | No      | No           |
| 20    | 79             | 2020-09-16            | AE.8                             | -                | -                                    | No                     | No      | No           |
| 21    | 8              | 2020-09-13            | AE.8                             | -                | -                                    | No                     | No      | No           |

- Participants were not vaccinated during the study period therefore they do not have a vaccination date and time from diagnosis to vaccination cannot be calculated.

-- Indicates missing data, variables with missing data were not included in the statistical analysis and are presented for description and context.

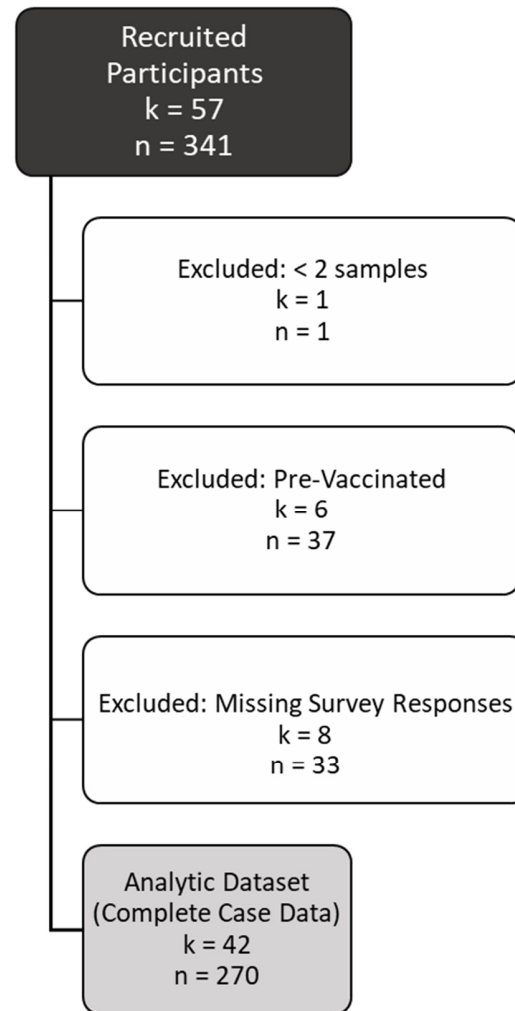

**Figure S1.** Exclusion criteria were applied to select an analytic data of  $n = 270$  observations from  $k = 42$  dependent participants (clusters).

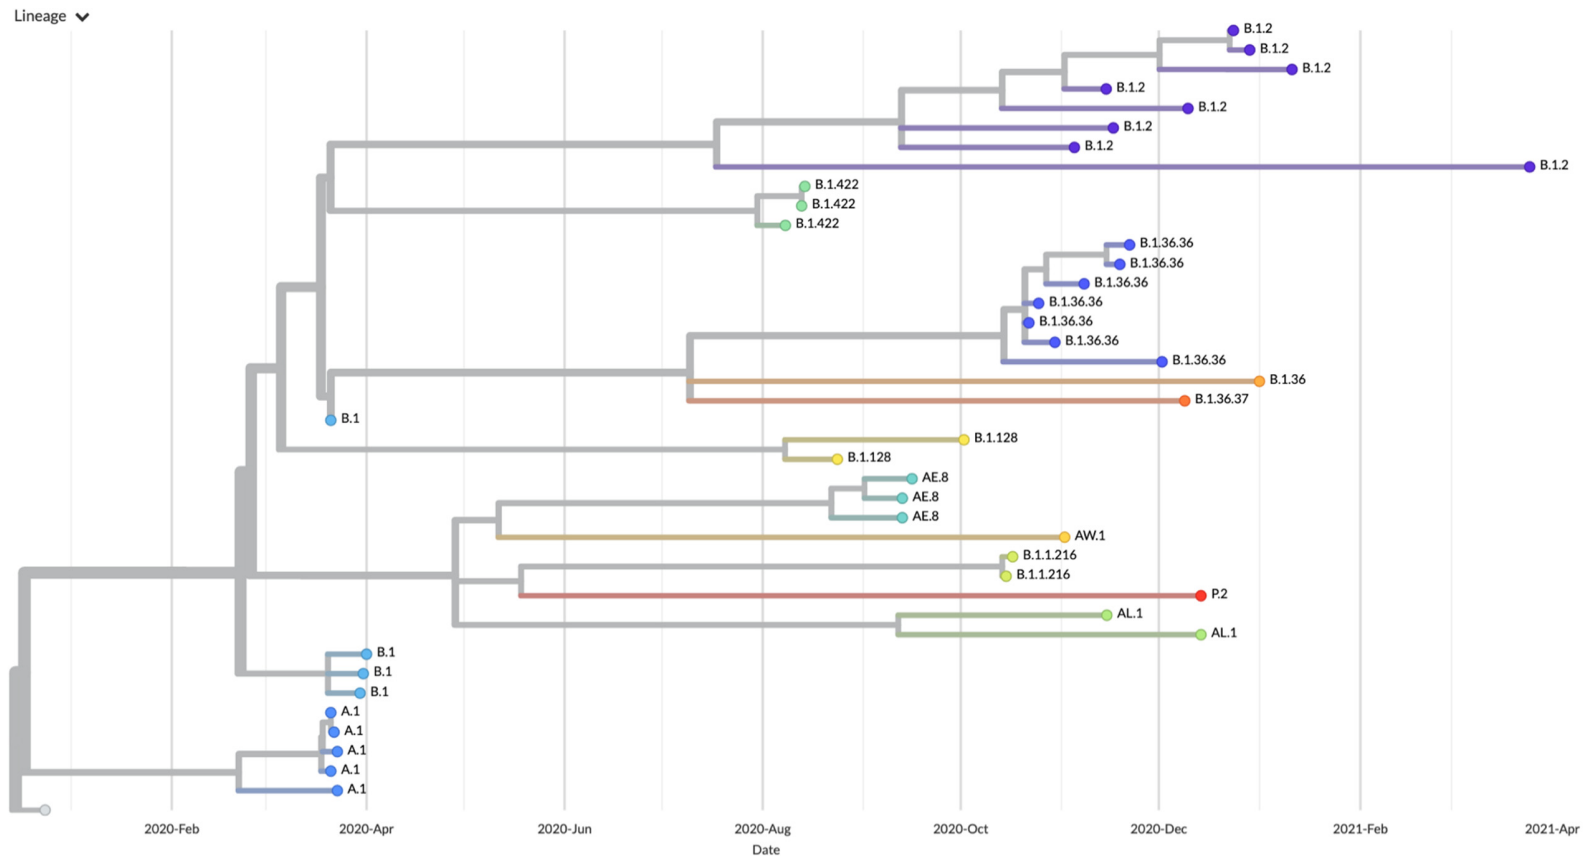

**Figure S2. Phylogenetic analysis of CARE Study Participants' SARS-CoV-2 genomes.** A phylogenetic tree was constructed using Fasttree and visualized in Nextstrain and lineage assignment was performed using the Phylogenetic Assignment of Named Global Outbreak Lineages tool (Pango/Usher Version 1.15.1), the Wuhan-Hu-1 isolate was used as the reference sequence (MN908947.3). Whole genome sequencing was performed at the BCCDC PHL using a modified ARTIC tiled 1200bp amplicon scheme, only sequences of sufficient quality were used in phylogenetic analysis (85% completeness and 10X depth of coverage). Date (x-axis) refers to the collection date of the positive SARS-CoV-2 diagnostic specimen. Colours on the tree tips correspond with SARS-CoV-2 lineage.
